# Supplementary material
Source: publisher figshare collection journal article supplement (https://tandf.figshare.com/ndownloader/files/16860656)
Supplement: Supplementary file 1 [file 16860656]

**Experimental and Theoretical Approaches of Molecular Geometry and Mesophase Behavior Relationship of Laterally Substituted Azopyridines**

M. Hagara,b*, H. A. Ahmeda,c*, and O.A. Alhaddaddd

1. College of Sciences, Chemistry Department, Yanbu, Taibah University, Saudi Arabia.
2. Faculty of Science, Chemistry Department, Alexandria University, Alexandria, Egypt
3. Faculty of Science, Department of Chemistry, Cairo University, Cairo, Egypt.
4. College of Sciences, Chemistry Department, Madina Monawara, Taibah University, Saudi Arabia.


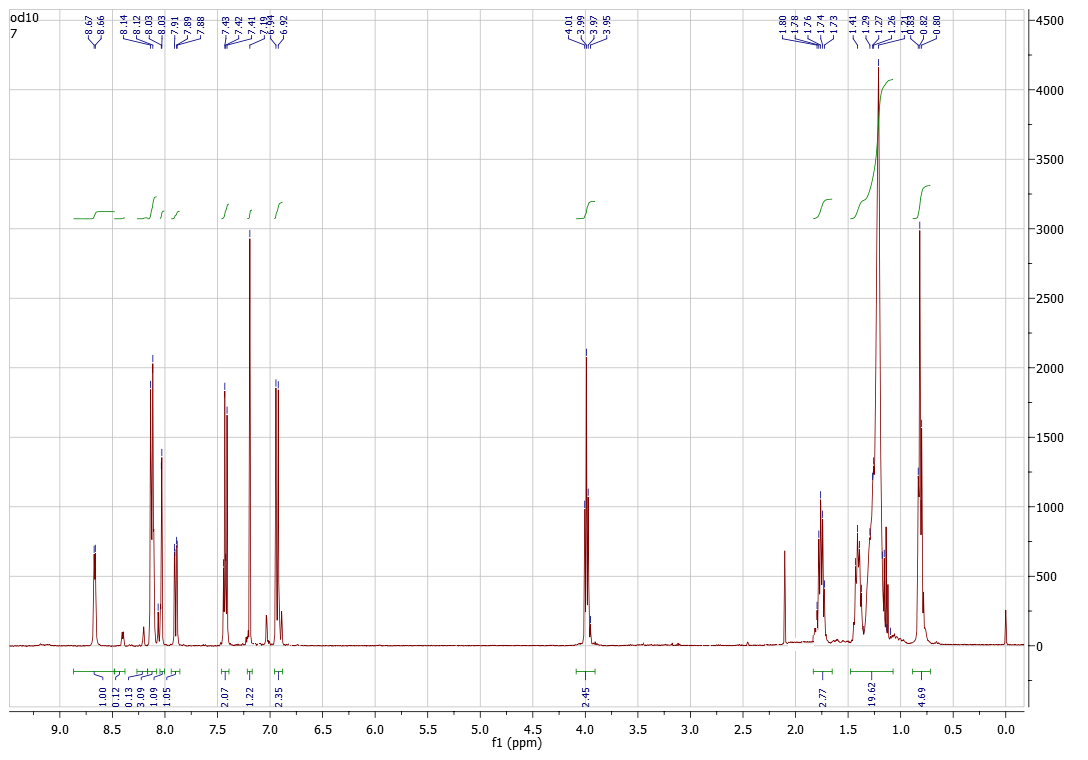


Figure S1.*1HNMR of 4-(2-(pyridin-4-yl)diazenyl-2-chlorophenyl)​ 4-decyloxybenzoate* **I**10

Figure S2.*13C NMR of 4-(2-(pyridin-4-yl)diazenyl-2-chlorophenyl)​ 4-decyloxybenzoate* **I**10


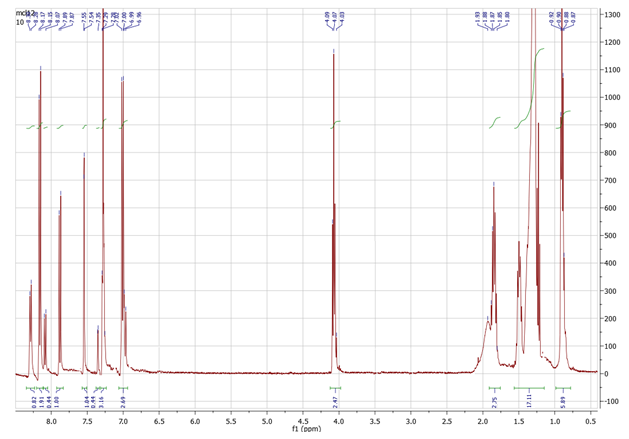


Figure S3.*1HNMR of 4-(2-(pyridin-4-yl)diazenyl-3-chlorophenyl)​ 4-decyloxybenzoate* **II**10

Figure S4.*13C NMR of 4-(2-(pyridin-4-yl)diazenyl-3-chlorophenyl)​ 4-decyloxybenzoate* **II**10
